# Supplementary material for: Characterization of Two Mitochondrial Genomes and Gene Expression Analysis Reveal Clues for Variations, Evolution, and Large-Sclerotium Formation in Medical Fungus Wolfiporia cocos
Source: Front Microbiol. 2020 Aug 4;11:1804. doi: 10.3389/fmicb.2020.01804 (PMC7417453; doi:10.3389/fmicb.2020.01804)
Supplement: Supplementary file 1 [file Table_1.XLSX]

## Sheet: Sheet1 (2)
Table S1 Primer information for sequence verification and qRT-PCR
Primer Name	Primer Sequence (5'-3')	Tm (℃)	GC (%)	Target amplification region	Primer position	Length of Products (bp)	Usage
WcB16-1-F	GTTCCGGGCTTCAACATTTATC	62	45.5	Mitogenome of W. cocos BL16	414-435	3894	sequence verification of the assembled mitogenome of W. cocos BL16
WcB16-1-R	AGAGGCAGATACGGGAGTAG	62	55		4289-4308
WcB16-2-F	GCCGGAACGTGGCTAATA	62	55.6	Mitogenome of W. cocos BL16	14159-14176	3790
WcB16-2-R	AGAGGGTGGCTTGCTTTC	62	55.6		17931-17948
WcB16-3-F	CGGAACGGGTACAAGAAGAG	62	55	Mitogenome of W. cocos BL16	25615-25624	3893
WcB16-3-R	GAGACAAGAGCCCGAATGAG	62	55		29308-29507
WcB16-4-F	CTTCCCACGGGATTTCCTTAG	62	52.4	Mitogenome of W. cocos BL16	36015-35035	3735
WcB16-4-R	CCCGAGACACACTCCTTATTG	62	52.4		39729-39749
WcB16-5-F	CATAAAGGGTCGGGCGTATC	62	55	Mitogenome of W. cocos BL16	48211-48230	3247
WcB16-5-R	GTCCCGTTCCTACTTCCTTATTC	62	47.8		51435-51457
WcB16-6-F	CGCGCGAGAGAGTTGTTATTA	62	47.6	Mitogenome of W. cocos BL16	62203-62223	3417
WcB16-6-R	GGACCGGTGTGTGCTATTT	62	52.6		65601-65619
WcB16-7-F	TCTCTTTCGTGCTGGGTTATTC	62	45.5	Mitogenome of W. cocos BL16	75186-75207	3769
WcB16-7-R	GGAACCTGAACAGGCTCTATTT	62	45.5		78933-78954
WcB16-8-F	TAGATCCGCGATTACCCATTTC	62	45.5	Mitogenome of W. cocos BL16	86959-86978	3901
WcB16-8-R	GTGTGCTCCGAGGCTATTT	62	52.6		90841-90859
WcB16-9-F	GCTTACCTTTGTACGCCTATCT	62	45.5	Mitogenome of W. cocos BL16	96481-96502	3471
WcB16-9-R	CGGTTGGCTATCTGGTATGTT	62	47.6		99931-99951
WcB16-10-F	TGTGGGTCCGGGACTATTA	62	52.6	Mitogenome of W. cocos BL16	110600-110618	3698
WcB16-10-R	CACCGTGCTCCTCCTTATTC	62	55		114278-114297
WcB16-11-F	CCTGCGACCGACAATTACA	62	52.6	Mitogenome of W. cocos BL16	121611-121629	3252
WcB16-11-R	GGGACTGGGAGGTTGAATAAG	62	52.4		124842-124862
WcB16-12-F	GAGAGGCAGGCATAGCATATT	62	47.6	Mitogenome of W. cocos BL16	131133-131153	3932
WcB16-12-R	GGAAGAGAGCGTAGCGTTTAG	62	52.4		135044-135064
WcB16-13-F	GCAGCGGTTCCACGATAA	62	55.6	Mitogenome of W. cocos BL16	5674-5691	3981
WcB16-13-R	GAGGAGGGTTCAGCGTAAATAA	62	45.5		9634-9655
WcB16-14-F	CCGTCGCCGTCAATAATACC	62	55	Mitogenome of W. cocos BL16	11234-11253	3922
WcB16-14-R	CCACAGGGTTGTTCTCTCTAATG	62	47.8		15134-15156
WcB16-15-F	GACCCGAAATTCCTCCTACTTAC	62	47.8	Mitogenome of W. cocos BL16	17377-17399	3889
WcB16-15-R	GTGTCCCGCCAAGCTATT	62	55.6		21231-21248
WcB16-16-F	ACCTCATCTACAACGCCTAAC	62	47.6	Mitogenome of W. cocos BL16	21636-21656	3965
WcB16-16-R	CTTTCGAGCCCTCCCTTATC	62	55		25581-25600
WcB16-17-F	GCAGTGTCCTCTAAGTCCAATC	62	50	Mitogenome of W. cocos BL16	29018-29039	3856
WcB16-17-R	TGGGTTGGCCACCATAAC	62	55.6		32857-32874
WcB16-18-F	CCTCCCGTCTTTATTGGAAGG	62	52.4	Mitogenome of W. cocos BL16	32782-32802	3883
WcB16-18-R	CTGGCGATCCTAAGGGAAAC	62	55		36644-36665
WcB16-19-F	GCTAGCGCAGCGAGAATAA	62	52.6	Mitogenome of W. cocos BL16	37957-37975	3683
WcB16-19-R	GTGCGGACTGGAGAGAAATAC	62	52.4		41620-41640
WcB16-20-F	GCAGCCAAGTACACACTCTATC	62	50	Mitogenome of W. cocos BL16	41976-41997	3973
WcB16-20-R	CAAGCCACCCTCTGTTATGG	62	55		45930-45949
WcB16-21-F	GTCGGGCGTGGATTGTATTA	62	50	Mitogenome of W. cocos BL16	51325-51344	3545
WcB16-21-R	CCAGAGGCAGCGACTATTT	62	52.6		54829-54851
WcB16-22-F	CACAAGGAGCCGAGGTTTAG	62	55	Mitogenome of W. cocos BL16	57870-57889	3828
WcB16-22-R	CAGGTAATGACTCGTGGTATGG	62	50		61680-61698
WcB16-23-F	CTATCGGTGCAGAGTCGTAAAC	62	50	Mitogenome of W. cocos BL16	66432-66453	3855
WcB16-23-R	GTAGTGCCTACACGGGATTAAC	62	50		70266-70287
WcB16-24-F	CTCACCGCATTGAGACCATTA	62	47.6	Mitogenome of W. cocos BL16	70133-70153	3930
WcB16-24-R	CAAATAGCCGAGGGAGGTTTAG	62	50		74042-74063
WcB16-25-F	GGAGTGAGGCACCTAATCAAA	62	47.6	Mitogenome of W. cocos BL16	79552-79572	3916
WcB16-25-R	CCCTCTAGACCAGACGAATCTA	62	50		83447-83468
WcB16-26-F	TCCCAGAGGCTGTTAGTAGAA	62	47.6	Mitogenome of W. cocos BL16	80823-80843	3916
WcB16-26-R	GGTGTGAGGAAGCCATTGA	62	52.6		84721-84739
WcB16-27-F	CCGGCAGCAAAGAGTATGT	62	52.6	Mitogenome of W. cocos BL16	88112-88130	3968
WcB16-27-R	GGGTGCTGTATTCGCCTTAT	62	55		92061-92080
WcB16-28-F	ACGCACGTTACCACCATAAA	62	45	Mitogenome of W. cocos BL16	93467-93486	3939
WcB16-28-R	CGGACTCCTGAAACCCTTATTC	62	50		97385-97406
WcB16-29-F	CTGCTAAGACCGGGAGAGATAA	63	50	Mitogenome of W. cocos BL16	101458-101479	3975
WcB16-29-R	CGCCTCAAGGACAGAAAGTAAG	63	50		105412-105433
WcB16-30-F	GAGGCTAGATGTCCGAGTAGA	62	52.4	Mitogenome of W. cocos BL16	104078-104098	3870
WcB16-30-R	GCCTCGGAGAGTATGTCTTTG	62	52.4		107928-107948
WcB16-31-F	CTCCCTTCGTGTCGGTTATG	62	55	Mitogenome of W. cocos BL16	114585-114604	3886
WcB16-31-R	ATCTCTCACCCTAGGCTCTC	62	55		118452-118471
WcB16-32-F	GCGAAGCAGAGAGGGAATATAG	62	50	Mitogenome of W. cocos BL16	117957-117978	3999
WcB16-32-R	GGACCTTCGCGGAACTAAA	62	52.6		121935-121956
WcB16-33-F	GGTTTACCACGTTCCCGTAATA	62	45.5	Mitogenome of W. cocos BL16	124349-124370	3812
WcB16-33-R	GGTGTTCCTGGGTCTGTAATG	62	52.4		128141-128161
WcB16-34-F	CAGGAACACCCAAAGGAGAG	62	55	Mitogenome of W. cocos BL16	128151-128170	3683
WcB16-34-R	GATGCTGCTACCACCCATAC	62	55		131815-131834
WcB16-35-F	TCTTCCTATGGCTCTTGGATTG	62	45.5	Mitogenome of W. cocos BL16	44354-44375	3878
WcB16-35-R	GATACGCCCGACCCTTTATG	62	55		48211-48232
WcB16-36-F	GGCGTCCGCACAGAATTA	62	55.6	Mitogenome of W. cocos BL16	106654-106671	3823
WcB16-36-R	GCGCTACCTGCTCCTTATG	62	57.9		110459-110477
WcSS10-1-F	GTGCAGACAAACAACGGATAAG	62	45.5	Mitogenome of W. cocos MD-104 SS10	35027-35048	2251	sequence verification of the assembled mitogenome of W. cocos MD-104 SS10
WcSS10-1-R	CCCTGAAAGCAAATAGCACAAG	62	45.5		37256-37277
WcSS10-2-F	CCGCGAAGAATACCAGACTATC	62	50	Mitogenome of W. cocos MD-104 SS10	35027-35048	2102
WcSS10-2-R	GTCTCTGAGGGACGCATATTT	62	47.6		54148-54168
WcSS10-3-F	GTAGCTTAGCTTCGTCCTTCTG	62	50	Mitogenome of W. cocos MD-104 SS10	64889-64910	2309
WcSS10-3-R	GCCCATATCACCCACTCTATTC	62	50		67176-67197
WcSS10-4-F	GCTTACTAACCCGACCCAATAA	62	45.5	Mitogenome of W. cocos MD-104 SS10	105767-105798	1712
WcSS10-4-R	CAGGTTCTGTCTCTTCGTTAGG	62	50		107457-107478
WcSS10-5-F	GGCAGATACGGGAGTAGTAGAA	62	50	Mitogenome of W. cocos MD-104 SS10	88427-88448	2837
WcSS10-5-R	GAAGGCGTTGACAGTGGATTA	62	47.6		91243-91263
WcSS10-6-F	GGGTGATATGGGCCTATCTATTG	62	47.8	Mitogenome of W. cocos MD-104 SS10	67185-67207	2560
WcSS10-6-R	GACTGAGACCTACTGCCATAAC	62	50		69723-69744
WcSS10-7-F	CACCGCATCCTCTGGTATAAAG	62	50	Mitogenome of W. cocos MD-104 SS10	58407-58428	2828
WcSS10-7-R	CGGAAGAAGGCTACAGTGATAAA	62	43.5		61212-61234
WcSS10-8-F	AGACCCGTTCAACGACTAATG	62	47.6	Mitogenome of W. cocos MD-104 SS10	60506-60526	2708
WcSS10-8-R	CAAGGATGCAGCACCAATAAAG	62	45.5		63192-63213
WcSS10-9-F	CGGGCATCTTCTCTTCAGTT	62	50	Mitogenome of W. cocos MD-104 SS10	20150-20169	1893
WcSS10-9-R	ATCCTCGTTCCGCAGTTATG	62	50		22023-22042
WcSS10-10-F	GACACCTCGATGTCGACTTTAC	62	50	Mitogenome of W. cocos MD-104 SS10	118171-118192	3450
WcSS10-10-R	GACCTCATCTACAACGCCTAAC	62	50		121599-1216120
WcSS10-11-F	GCGACCAACCAGAAAGAGAATA	62	45.5	Mitogenome of W. cocos MD-104 SS10	68597-68618	3806
WcSS10-11-R	CACGCCTCACCATCTACTAAAC	62	50		72381-72402
WcSS10-12-F	CCGGGAAGTCCGCTATTATTT	62	47.6	Mitogenome of W. cocos MD-104 SS10	54001-54021	2418
WcSS10-12-R	ATTTGCCTGAATTGGGCTATTG	62	40.9		56397-56418
WcSS10-13-F	GGCCGTACAGGACAATAGTAATAA	62	41.7	Mitogenome of W. cocos MD-104 SS10	95277-95300	2468
WcSS10-13-R	GGCGATCCTTGTAGGCTATTT	62	47.2		97724-97744
WcSS10-14-F	CCATCAGCGATTTGGTGTAATG	62	45.5	Mitogenome of W. cocos MD-104 SS10	2090-2111	1991
WcSS10-14-R	GTTTAGGGACGAGGCTCATATT	62	45.5		4059-4080
WcSS10-15-F	AGACCCGTTCAACGACTAATG	62	47.6	Mitogenome of W. cocos MD-104 SS10	60-80	1538
WcSS10-15-R	TGGTGTGCGCGAAAGTAT	62	50		1580-1597
WcSS10-16-F	AGCGTTGTAGGAACCTCATATT	62	40.9	Mitogenome of W. cocos MD-104 SS10	56548-56569	1965
WcSS10-16-R	CCGTGGTACCCTCATTCTTATC	62	50		58491-58512
WcSS10-17-F	CGAAAGGGAGGAGAGGAAATAG	62	50	Mitogenome of W. cocos MD-104 SS10	11102-11123	3932
WcSS10-17-R	GGAGTTACCCGGAGTTTGATAG	62	50		15012-15033
WcSS10-18-F	CTTACTGCTTCGCAGCCTAATA	62	45.5	Mitogenome of W. cocos MD-104 SS10	79314-79335	3906
WcSS10-18-R	AACCGTCACCATCCACTAATC	62	47.5		83199-83219
Atp6q-F	TAGGGTTAAATGCTCCAATACTAGG	62	40	W. cocos BL16 atp6 region	56812-56839	200	quantitative real-time PCR (qRT-PCR)
Atp6q-R	CCCTATTTGTTCTCTAACCATTGAG	61	40		56987-57011
Atp8q-F	AATGCCTCAATTAATACC	47.3	33.3	W. cocos BL16 atp8 region	109552-109569	186
Atp8q-R	TAACCCCCATTGGATCGG	61.5	55.6		109720-109737
Atp9q-F	ATGAAGATAGGATTAAATTATC	46.8	22.7	W. cocos BL16 atp9 region	15536-15555	141
Atp9q-R	GGAGCCTTATTGACCCAAGA	59.1	50		15655-15676
Cobq-F	TGCTGTGCCTGTATTTGG	60	50	W. cocos BL16 cob region	9538-9557	157
Cobq-R	GTGGGTATGAAGGGCTAGTA	60	50		9677-9694
Cox1q-F	GTATTTCACTGCGGCAACATC	62	47.6	W. cocos BL16 cox1 region	97377-97396	153
Cox1q-R	GGAGCCGAATAAGGGTTTCA	62	50		97509-97529
Cox2q-F	GTGCATCACCCGGATTTA	59	50	W. cocos BL16 cox2 region	65966-65983	173
Cox2q-R	AAGCTCAATGGCTGTACC	59	50		66121-66138
Cox3q-F	TATCTTGGTTGCCACACTTCC	62	47.6	W. cocos BL16 cox3 region	80633-80653	151
Cox3q-R	GCCAGCAACCACCTATTTCTA	62	47.6		80763-80783
Nad1q-F	GGCTGAATCTGAACTGGTAG	60	50	W. cocos BL16 nad1 region	1805-1823	139
Nad1q-R	CGCGTTATACCCACCTAAG	59	52.6		1924-1943
Nad2q-F	GCCTCTGGTCAAATAGCAC	60	52.6	W. cocos BL16 nad2 region	85291-85310	173
Nad2q-R	CCAAATCATACCCGCCATAG	60	50		85445-85463
Nad3q-F	CCCTCTAGACCAGACGAATC	61	55	W. cocos BL16 nad3 region	83312-83331	133
Nad3q-R	CCTCAACGTCAAAGACCAAG	61	50		83390-83444
Nad4Lq-F	CCTAGCTCTCGGTAGGAAGAATA	62	47.8	W. cocos BL16 nad4L region	77210-77232	119
Nad4Lq-R	GCAGGAGCAGAATCAGTAATAGG	62	47.8		77306-77328
Nad4q-F	GCAACCTTGGTTCAACTG	59	50	W. cocos BL16 nad4 region	133076-133095	149
Nad4q-R	GACGTGGGCCCTATATAATC	59	50		133207-133224
Nad5q-F	TAGCCGAGGGAGGTTTAG	60	55.6	W. cocos BL16 nad5 region	73884-73901	174
Nad5q-R	TCCGGCCCTGAAGTATAA	60	50		74040-74057
Nad6q-F	GGCTACTTATTGTGCTTGGG	61	50	W. cocos BL16 nad6 region	40698-40715	142
Nad6q-R	TTGGCTACCTGCCTCTAA	60	50		40820-40839
PP2A-F	CACGTCTTGACTGGCTCTTAC	62	52.4	PP2A		144	reference gene in qRT-PCR
PP2A-R	CTTCGCTCCTGTCTTGTTCC	62	55
nad2-i-F	GCTATTTGACCAGAGGCCAT	62	50	W. cocos BL16 intron region in nad2-i2	85447-85466	3171	sequence verification of differences in introns between two mitogenomes of W. cocos
nad2-i-R	AGCAGCAGCACCTTTACA	62	50		88600-88617
cob-i-F	AGGCGAATTAGGATGTTCCG	62	50	W. cocos BL16 intron region in cob-i2	6579-6598	3075
cob-i-R	GAGGAGGGTTCAGCGTAAAT	62	50		9634-9653
cox3-i-F	CTACGTGGTGACCAGTTGTT	62	50	W. cocos BL16 intron region in cox3-i2	79653-79672	454
cox3-i-R	AACCAGGCCTCATTCACA	61	50		80089-80106
cox2-i-F	GCAAATGACGACCCACTCA	62	52.6	W. cocos BL16 intron region in cox2-i3	62537-62555	3600
cox2-i-R	GCTGCACCCGGATTTACA	62	55.6		66119-66136
nad5-i-F	GCCATAGCTCCGGTAAGA	60	55.6	W. cocos BL16 intron region in nad5-i1	73068-73085	3343
nad5-i-R	GGAGTTAGTGGTGCACAT	59	50		76393-76410
cox1-i-F	GTACCAGCACCTGATTCAAC	61	50	W. cocos BL16 intron region in cox1-i1	104170-104189	4728
cox1-i-R	CAGTCTTTGCAGGTATGATCGG	63	50		108876-108897
